# Supplementary material for: Simulation of H2/CH4 mixture permeation through MOF membranes using non-equilibrium molecular dynamics
Source: Royal Society of Chemistry journal article supplement (doi:10.1039/c8ta10167a), 2019-01-01
Supplement: c8ta10167a1.pdf [file c8ta10167a1.pdf]

**Supporting Information for**

**Simulation of H<sub>2</sub>/CH<sub>4</sub> Mixture Permeation through MOF Membranes  
Using Non-Equilibrium Molecular Dynamics**

Sadiye Velioglu and Seda Keskin\*

Department of Chemical and Biological Engineering, Koc University, Rumelifeneri Yolu, Sariyer, 34450,  
Istanbul, Turkey

\*Email - skeskin@ku.edu.tr

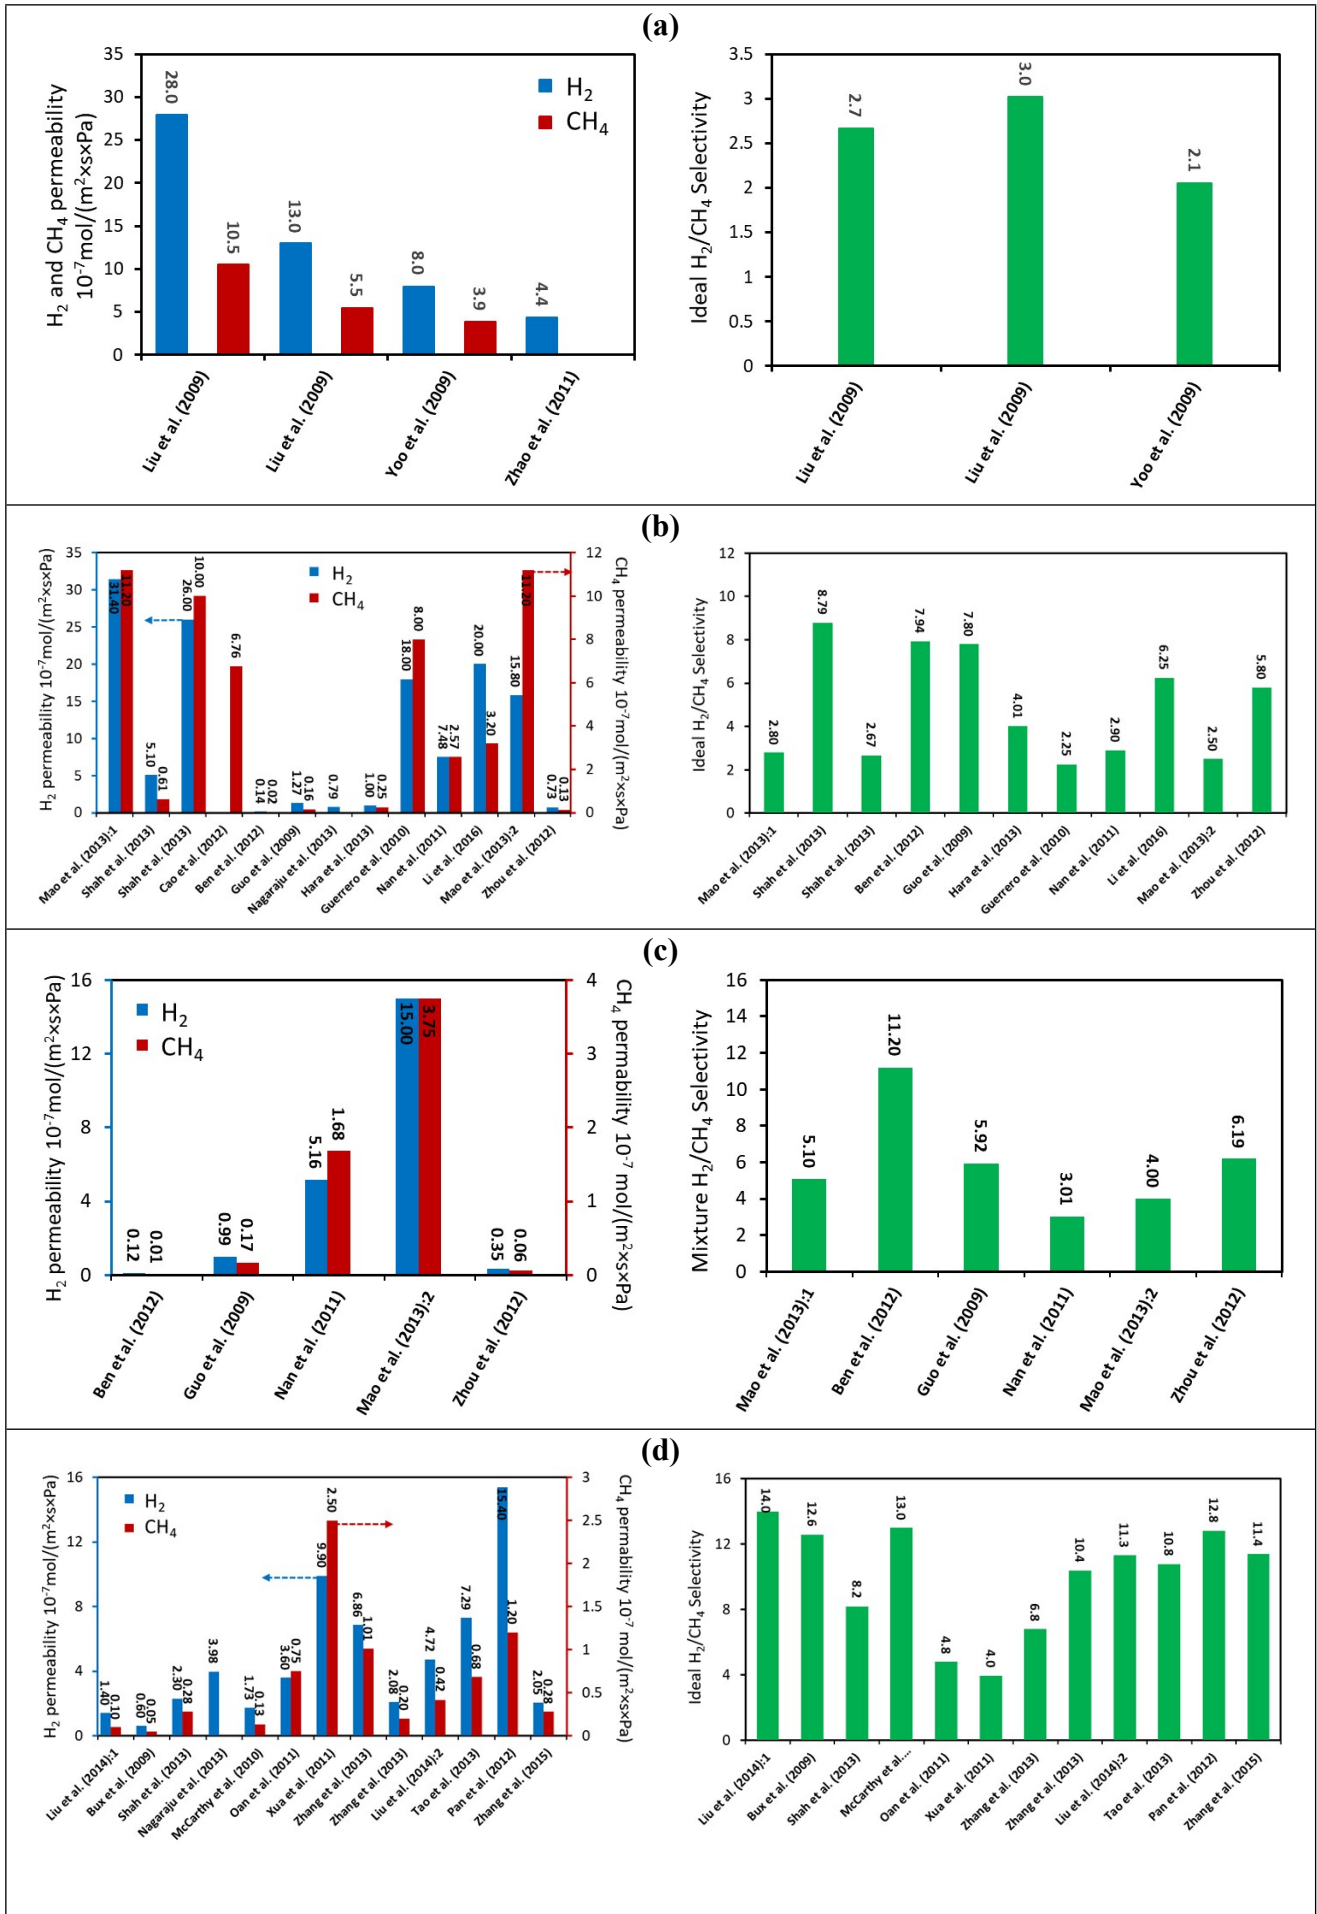

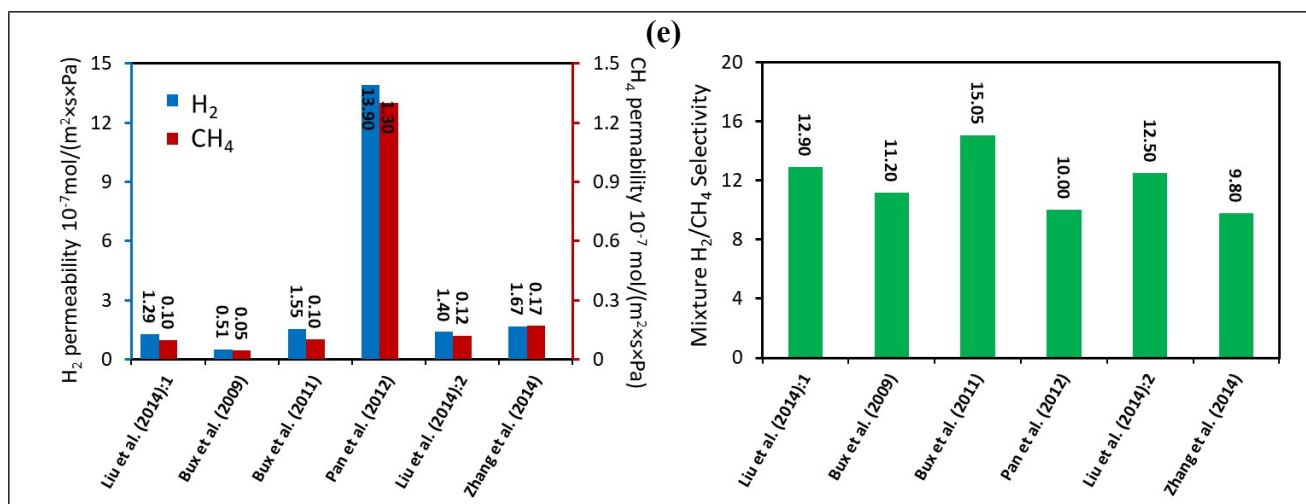

**Figure S1.** Experimental membrane data reported for (a) MOF-5<sup>1-3</sup>, (b) and (c) Cu-BTC<sup>4-15</sup> and (d) and (e) ZIF-8<sup>16-27</sup>. (a), (b) and (d) represent the single-component H<sub>2</sub> and CH<sub>4</sub> permeabilities and ideal selectivities for MOF-5, Cu-BTC and ZIF-8, respectively. (c) and (e) represent the binary gas mixture (H<sub>2</sub>/CH<sub>4</sub>: 50/50) permeabilities and selectivities for Cu-BTC and ZIF-8, respectively.

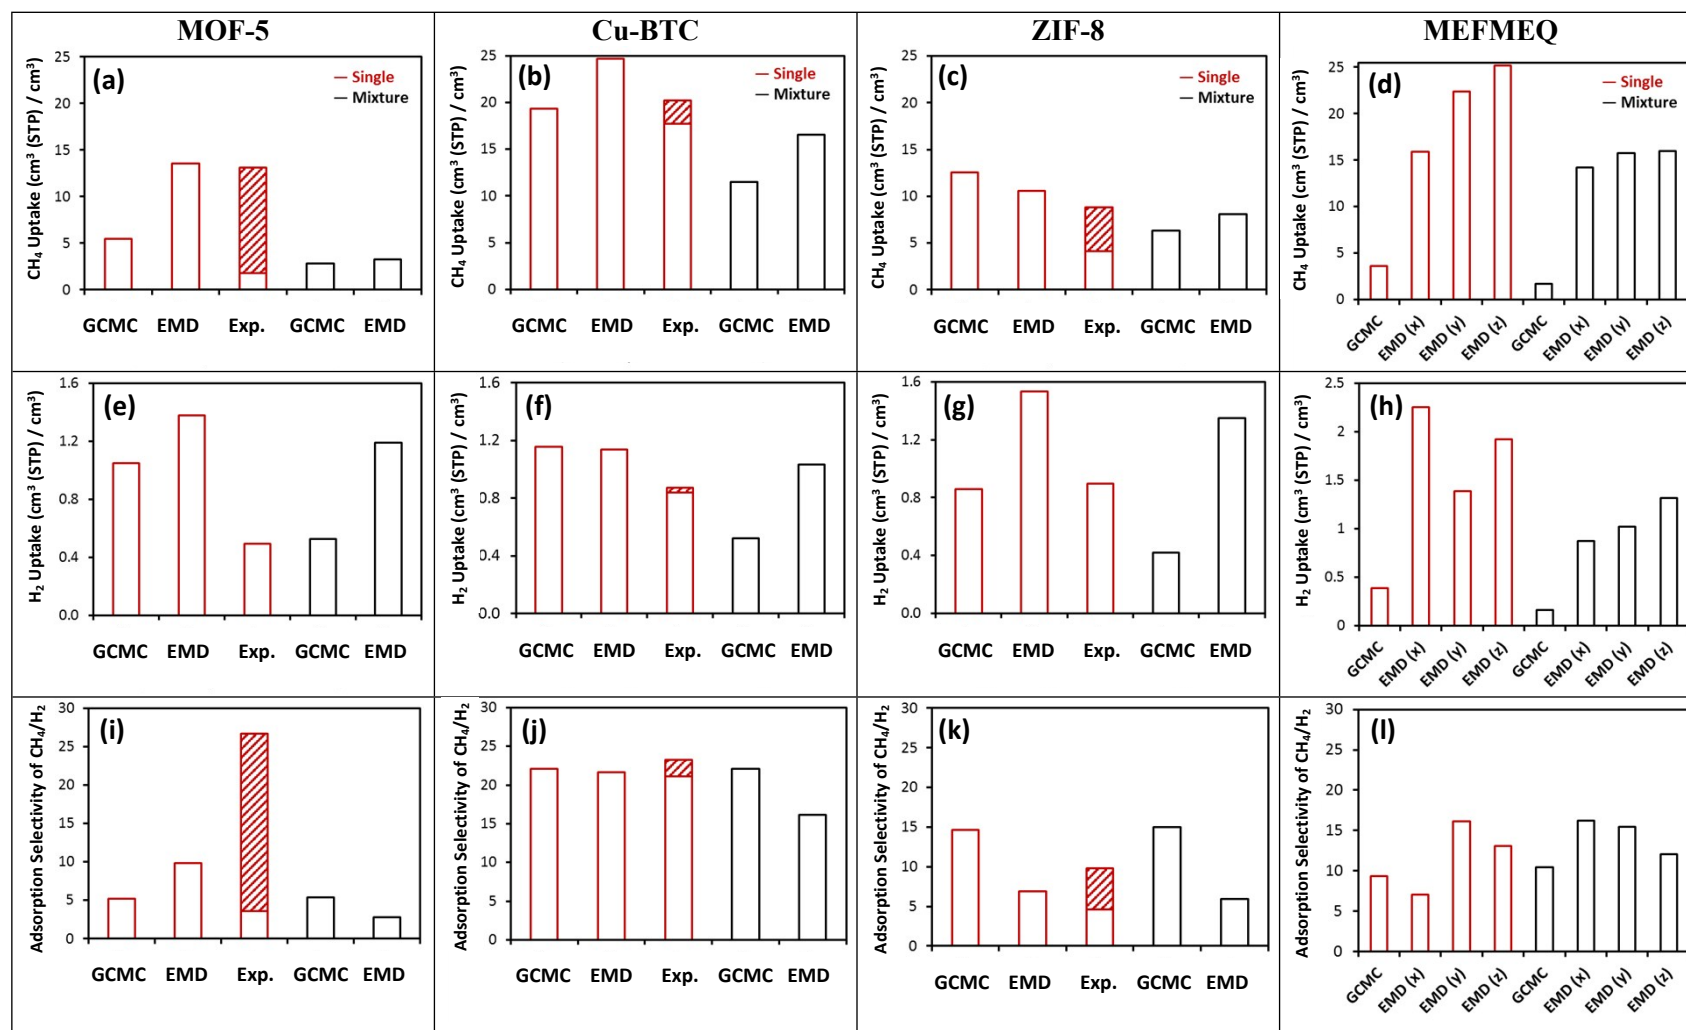

**Figure S2.** (a) – (d) CH<sub>4</sub>, (e) – (h) H<sub>2</sub> adsorption properties, (i) – (l) H<sub>2</sub>/CH<sub>4</sub> adsorption selectivities of MOF-5, Cu-BTC, ZIF-8, and MEFMEQ. Single-component and binary gas mixture properties are shown with red and black columns. EMD simulations for the adsorption calculations were performed without any external force in this study. The filled part with a pattern in the experimental data represents the variations by showing the minimum and maximum values corresponding to its bottom and top borders. Adsorption mechanism is investigated at each surface of MEFMEQ due to its asymmetry. Experimental gas uptakes (referred as Exp.) available in the literature are given in Table S1.

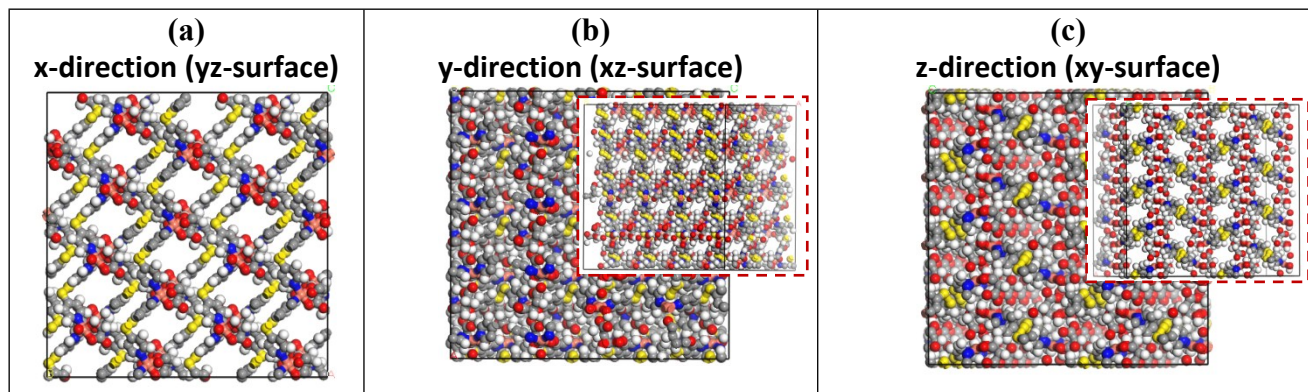

**Figure S3.** Unit cell view of MEFMEQ from (a) x, (b) y and (c) z direction. The inset snapshots are given for the clarification of the available paths for gas transport.

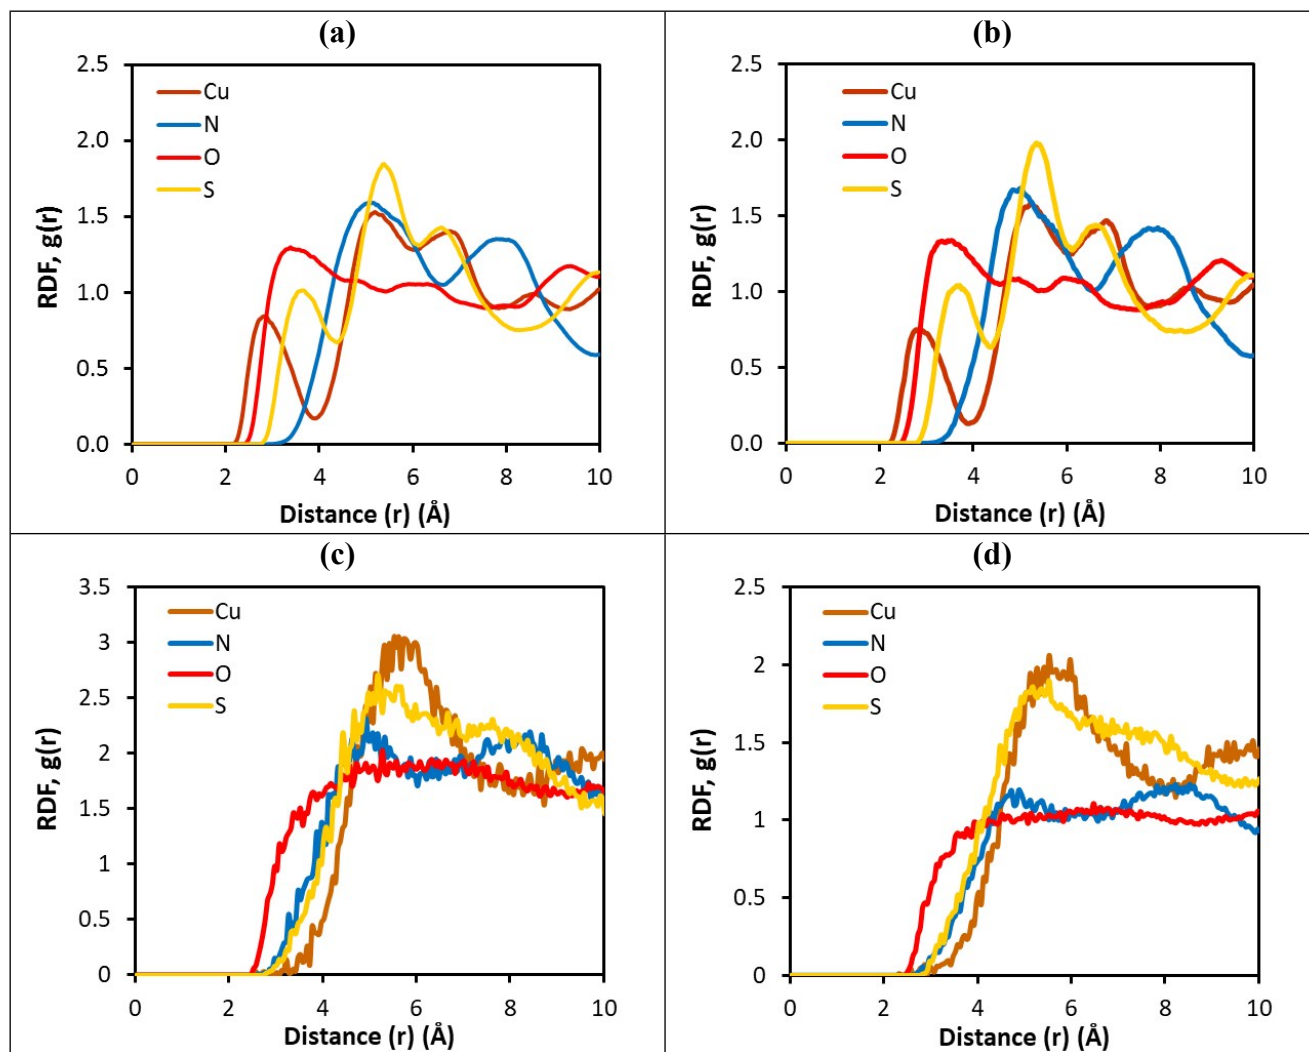

**Figure S4.** Radial distribution functions (RDF) between the adsorbate,  $H_2$  and four different atom types (namely, Cu, N, O, and S) existing in the framework of MEFMEQ defined by (a) single-component EMD simulations, (b) mixture EMD simulations, (c) single-component NEMD simulations, and (d) mixture NEMD simulations.  $H_2$  population around Cu, N, O, and S atoms is represented by brown, blue, red and yellow colors.

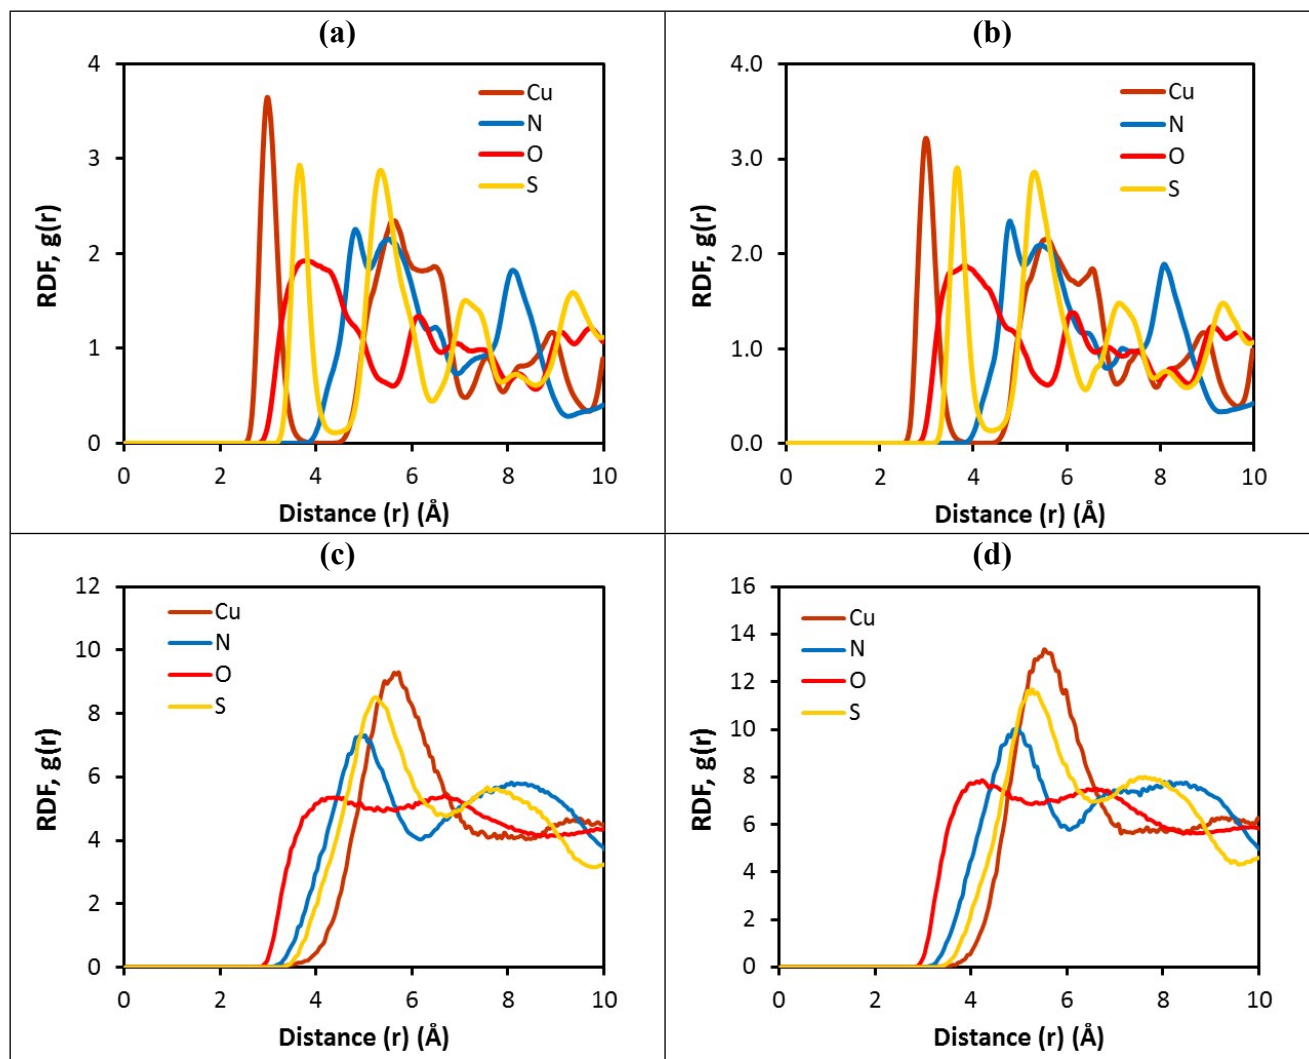

**Figure S5.** Radial distribution functions (RDF) between the adsorbate,  $\text{CH}_4$  and four different atom types (namely, Cu, N, O, and S) existing in the framework of MEFMEQ defined by (a) single-component EMD simulations, (b) mixture EMD simulations, (c) single-component NEMD simulations, and (d) mixture NEMD simulations.  $\text{H}_2$  population around Cu, N, O, and S atoms is represented by brown, blue, red and yellow colors.

**Table S1.** CH<sub>4</sub> and H<sub>2</sub> adsorption performances of MOF-5, Cu-BTC and ZIF-8 reported by experiments.

| CH <sub>4</sub> uptake (cm <sup>3</sup> STP/cm <sup>3</sup> ) |                              | H <sub>2</sub> uptake (cm <sup>3</sup> STP/cm <sup>3</sup> ) |                              |
|---------------------------------------------------------------|------------------------------|--------------------------------------------------------------|------------------------------|
| <b>MOF-5</b>                                                  |                              |                                                              |                              |
| 1.78                                                          | @ 1 bar, 298 K <sup>28</sup> | 0.492                                                        | @ 1 bar, 300 K <sup>29</sup> |
| 3.27                                                          | @ 1 bar, 298 K <sup>30</sup> |                                                              |                              |
| 8.91                                                          | @ 1 bar, 298 K <sup>31</sup> |                                                              |                              |
| 11.40                                                         | @ 1 bar, 298 K <sup>32</sup> |                                                              |                              |
| 13.14                                                         | @ 1 bar, 298 K <sup>33</sup> |                                                              |                              |
| <b>Cu-BTC</b>                                                 |                              |                                                              |                              |
| 17.71                                                         | @ 1 bar, 298 K <sup>30</sup> | 0.84                                                         | @ 1 bar, 300 K <sup>29</sup> |
| 18.46                                                         | @ 1 bar, 303 K <sup>34</sup> | 0.87                                                         | @ 1 bar, 298 K <sup>35</sup> |
| 19.10                                                         | @ 1 bar, 295 K <sup>36</sup> |                                                              |                              |
| 20.20                                                         | @ 1 bar, 300 K <sup>37</sup> |                                                              |                              |
| <b>ZIF-8</b>                                                  |                              |                                                              |                              |
| 4.15                                                          | @ 1 bar, 300 K <sup>38</sup> | 0.898                                                        | @ 1 bar, 300 K <sup>38</sup> |
| 5.55                                                          | @ 1 bar, 298 K <sup>39</sup> |                                                              |                              |
| 8.82                                                          | @ 1 bar, 298 K <sup>40</sup> |                                                              |                              |

**References:**

- Liu, Y.; Ng, Z.; Khan, E. A.; Jeong, H.-K.; Ching, C.-b.; Lai, Z., Synthesis of continuous MOF-5 membranes on porous  $\alpha$ -alumina substrates. *Microporous and Mesoporous Materials* **2009**, *118* (1), 296-301.
- Yoo, Y.; Lai, Z.; Jeong, H.-K., Fabrication of MOF-5 membranes using microwave-induced rapid seeding and solvothermal secondary growth. *Microporous and mesoporous materials* **2009**, *123* (1-3), 100-106.
- Zhao, Z.; Ma, X.; Li, Z.; Lin, Y., Synthesis, characterization and gas transport properties of MOF-5 membranes. *Journal of membrane science* **2011**, *382* (1-2), 82-90.
- Cao, F.; Zhang, C.; Xiao, Y.; Huang, H.; Zhang, W.; Liu, D.; Zhong, C.; Yang, Q.; Yang, Z.; Lu, X., Helium recovery by a Cu-BTC metal-organic-framework membrane. *Industrial & Engineering Chemistry Research* **2012**, *51* (34), 11274-11278.
- Nagaraju, D.; Bhagat, D. G.; Banerjee, R.; Kharul, U. K., In situ growth of metal-organic frameworks on a porous ultrafiltration membrane for gas separation. *Journal of Materials Chemistry A* **2013**, *1* (31), 8828-8835.
- Guerrero, V. V.; Yoo, Y.; McCarthy, M. C.; Jeong, H.-K., HKUST-1 membranes on porous supports using secondary growth. *Journal of Materials Chemistry* **2010**, *20* (19), 3938-3943.
- Li, W.; Zhang, Y.; Zhang, C.; Meng, Q.; Xu, Z.; Su, P.; Li, Q.; Shen, C.; Fan, Z.; Qin, L., Transformation of metal-organic frameworks for molecular sieving membranes. *Nature communications* **2016**, *7*, 11315.
- Hara, N.; Yoshimune, M.; Negishi, H.; Haraya, K.; Hara, S.; Yamaguchi, T., Metal-organic framework membranes with layered structure prepared within the porous support. *RSC Advances* **2013**, *3* (34), 14233-14236.
- Nan, J.; Dong, X.; Wang, W.; Jin, W.; Xu, N., Step-by-step seeding procedure for preparing HKUST-1 membrane on porous  $\alpha$ -alumina support. *Langmuir* **2011**, *27* (8), 4309-4312.
- Shah, M. N.; Gonzalez, M. A.; McCarthy, M. C.; Jeong, H.-K., An unconventional rapid synthesis of high performance metal-organic framework membranes. *Langmuir* **2013**, *29* (25), 7896-7902.
- Guo, H.; Zhu, G.; Hewitt, I. J.; Qiu, S., "Twin copper source" growth of metal-organic framework membrane: Cu<sub>3</sub>(BTC)<sub>2</sub> with high permeability and selectivity for recycling H<sub>2</sub>. *Journal of the American Chemical Society* **2009**, *131* (5), 1646-1647.



12. Mao, Y.; Cao, W.; Li, J.; Liu, Y.; Ying, Y.; Sun, L.; Peng, X., Enhanced gas separation through well-intergrown MOF membranes: seed morphology and crystal growth effects. *Journal of Materials Chemistry A* **2013**, *1* (38), 11711-11716.
13. Mao, Y.; Huang, H.; Cao, W.; Li, J.; Sun, L.; Jin, X.; Peng, X., Room temperature synthesis of free-standing HKUST-1 membranes from copper hydroxide nanostrands for gas separation. *Chemical Communications* **2013**, *49* (50), 5666-5668.
14. Ben, T.; Lu, C.; Pei, C.; Xu, S.; Qiu, S., Polymer-Supported and Free-Standing Metal–Organic Framework Membrane. *Chemistry—A European Journal* **2012**, *18* (33), 10250-10253.
15. Zhou, S.; Zou, X.; Sun, F.; Zhang, F.; Fan, S.; Zhao, H.; Schiestel, T.; Zhu, G., Challenging fabrication of hollow ceramic fiber supported Cu<sub>3</sub>(BTC)<sub>2</sub> membrane for hydrogen separation. *Journal of Materials Chemistry* **2012**, *22* (20), 10322-10328.
16. Zhang, X.; Liu, Y.; Kong, L.; Liu, H.; Qiu, J.; Han, W.; Weng, L.-T.; Yeung, K. L.; Zhu, W., A simple and scalable method for preparing low-defect ZIF-8 tubular membranes. *Journal of Materials Chemistry A* **2013**, *1* (36), 10635-10638.
17. Bux, H.; Liang, F.; Li, Y.; Cravillon, J.; Wiebcke, M.; Caro, J. R., Zeolitic imidazolate framework membrane with molecular sieving properties by microwave-assisted solvothermal synthesis. *Journal of the American Chemical Society* **2009**, *131* (44), 16000-16001.
18. Liu, Y.; Wang, N.; Diestel, L.; Steinbach, F.; Caro, J., MOF membrane synthesis in the confined space of a vertically aligned LDH network. *Chemical communications* **2014**, *50* (32), 4225-4227.
19. Bux, H.; Feldhoff, A.; Cravillon, J.; Wiebcke, M.; Li, Y.-S.; Caro, J., Oriented zeolitic imidazolate framework-8 membrane with sharp H<sub>2</sub>/C<sub>3</sub>H<sub>8</sub> molecular sieve separation. *Chemistry of Materials* **2011**, *23* (8), 2262-2269.
20. Liu, D.; Ma, X.; Xi, H.; Lin, Y., Gas transport properties and propylene/propane separation characteristics of ZIF-8 membranes. *Journal of Membrane Science* **2014**, *451*, 85-93.
21. Tao, K.; Cao, L.; Lin, Y.; Kong, C.; Chen, L., A hollow ceramic fiber supported ZIF-8 membrane with enhanced gas separation performance prepared by hot dip-coating seeding. *Journal of Materials Chemistry A* **2013**, *1* (42), 13046-13049.
22. Pan, Y.; Wang, B.; Lai, Z., Synthesis of ceramic hollow fiber supported zeolitic imidazolate framework-8 (ZIF-8) membranes with high hydrogen permeability. *Journal of membrane science* **2012**, *421*, 292-298.
23. Xu, G.; Yao, J.; Wang, K.; He, L.; Webley, P. A.; Chen, C.-S.; Wang, H., Preparation of ZIF-8 membranes supported on ceramic hollow fibers from a concentrated synthesis gel. *Journal of membrane science* **2011**, *385*, 187-193.
24. McCarthy, M. C.; Varela-Guerrero, V.; Barnett, G. V.; Jeong, H.-K., Synthesis of zeolitic imidazolate framework films and membranes with controlled microstructures. *Langmuir* **2010**, *26* (18), 14636-14641.
25. Pan, Y.; Lai, Z., Sharp separation of C<sub>2</sub>/C<sub>3</sub> hydrocarbon mixtures by zeolitic imidazolate framework-8 (ZIF-8) membranes synthesized in aqueous solutions. *Chemical Communications* **2011**, *47* (37), 10275-10277.
26. Shah, M.; Kwon, H. T.; Tran, V.; Sachdeva, S.; Jeong, H.-K., One step in situ synthesis of supported zeolitic imidazolate framework ZIF-8 membranes: Role of sodium formate. *Microporous and Mesoporous Materials* **2013**, *165*, 63-69.
27. Liu, Y.; Wang, N.; Pan, J. H.; Steinbach, F.; Caro, J. R., In situ synthesis of MOF membranes on ZnAl-CO<sub>3</sub> LDH buffer layer-modified substrates. *Journal of the American Chemical Society* **2014**, *136* (41), 14353-14356.
28. Saha, D.; Bao, Z.; Jia, F.; Deng, S., Adsorption of CO<sub>2</sub>, CH<sub>4</sub>, N<sub>2</sub>O, and N<sub>2</sub> on MOF-5, MOF-177, and zeolite 5A. *Environmental science & technology* **2010**, *44* (5), 1820-1826.
29. Panella, B.; Hirscher, M.; Pütter, H.; Müller, U., Hydrogen adsorption in metal–organic frameworks: Cu-MOFs and Zn-MOFs compared. *Advanced Functional Materials* **2006**, *16* (4), 520-524.
30. Mason, J. A.; Veenstra, M.; Long, J. R., Evaluating metal–organic frameworks for natural gas storage. *Chemical Science* **2014**, *5* (1), 32-51.
31. Düren, T.; Sarkisov, L.; Yaghi, O. M.; Snurr, R. Q., Design of new materials for methane storage. *Langmuir* **2004**, *20* (7), 2683-2689.

32. Kondo, M.; Yoshitomi, T.; Matsuzaka, H.; Kitagawa, S.; Seki, K., Three-Dimensional Framework with Channeling Cavities for Small Molecules:  $\{[M_2(4,4'\text{-bpy})_3(\text{NO}_3)_4] \cdot x\text{H}_2\text{O}\}_n$  (M=Co, Ni, Zn). *Angewandte Chemie International Edition in English* **1997**, *36* (16), 1725-1727.
33. Pillai, R. S.; Pinto, M. L.; Pires, J.; Jorge, M.; Gomes, J. R., Understanding gas adsorption selectivity in IRMOF-8 using molecular simulation. *ACS applied materials & interfaces* **2015**, *7* (1), 624-637.
34. Hamon, L.; Jolimaître, E.; Pirngruber, G. D., CO<sub>2</sub> and CH<sub>4</sub> separation by adsorption using Cu-BTC metal-organic framework. *Industrial & Engineering Chemistry Research* **2010**, *49* (16), 7497-7503.
35. Li, Y.; Yang, R. T., Hydrogen storage in metal-organic and covalent-organic frameworks by spillover. *AIChE Journal* **2008**, *54* (1), 269-279.
36. Chowdhury, P.; Mekala, S.; Dreisbach, F.; Gumma, S., Adsorption of CO, CO<sub>2</sub> and CH<sub>4</sub> on Cu-BTC and MIL-101 metal organic frameworks: Effect of open metal sites and adsorbate polarity. *Microporous and Mesoporous Materials* **2012**, *152*, 246-252.
37. Simmons, J. M.; Wu, H.; Zhou, W.; Yildirim, T., Carbon capture in metal-organic frameworks-A comparative study. *Energy & Environmental Science* **2011**, *4* (6), 2177-2185.
38. Zhou, W.; Wu, H.; Hartman, M. R.; Yildirim, T., Hydrogen and methane adsorption in metal-organic frameworks: A high-pressure volumetric study. *The Journal of Physical Chemistry C* **2007**, *111* (44), 16131-16137.
39. Autié Castro, G.; Jardim, E. D. O.; Reguera, E.; Vilarrasa-García, E.; Rodríguez-Castellón, E.; Cavalcante Jr, C. L., CH<sub>4</sub> and CO<sub>2</sub> Adsorption Study in ZIF-8 and Al-BDC MOFs. *Biological and Chemical Research* **2017**, 234-246.
40. Huang, H.; Zhang, W.; Liu, D.; Liu, B.; Chen, G.; Zhong, C., Effect of temperature on gas adsorption and separation in ZIF-8: A combined experimental and molecular simulation study. *Chemical engineering science* **2011**, *66* (23), 6297-6305.
